# Supplementary material
Source: PubMed Central journal article supplement (PMC3121974)

**A:**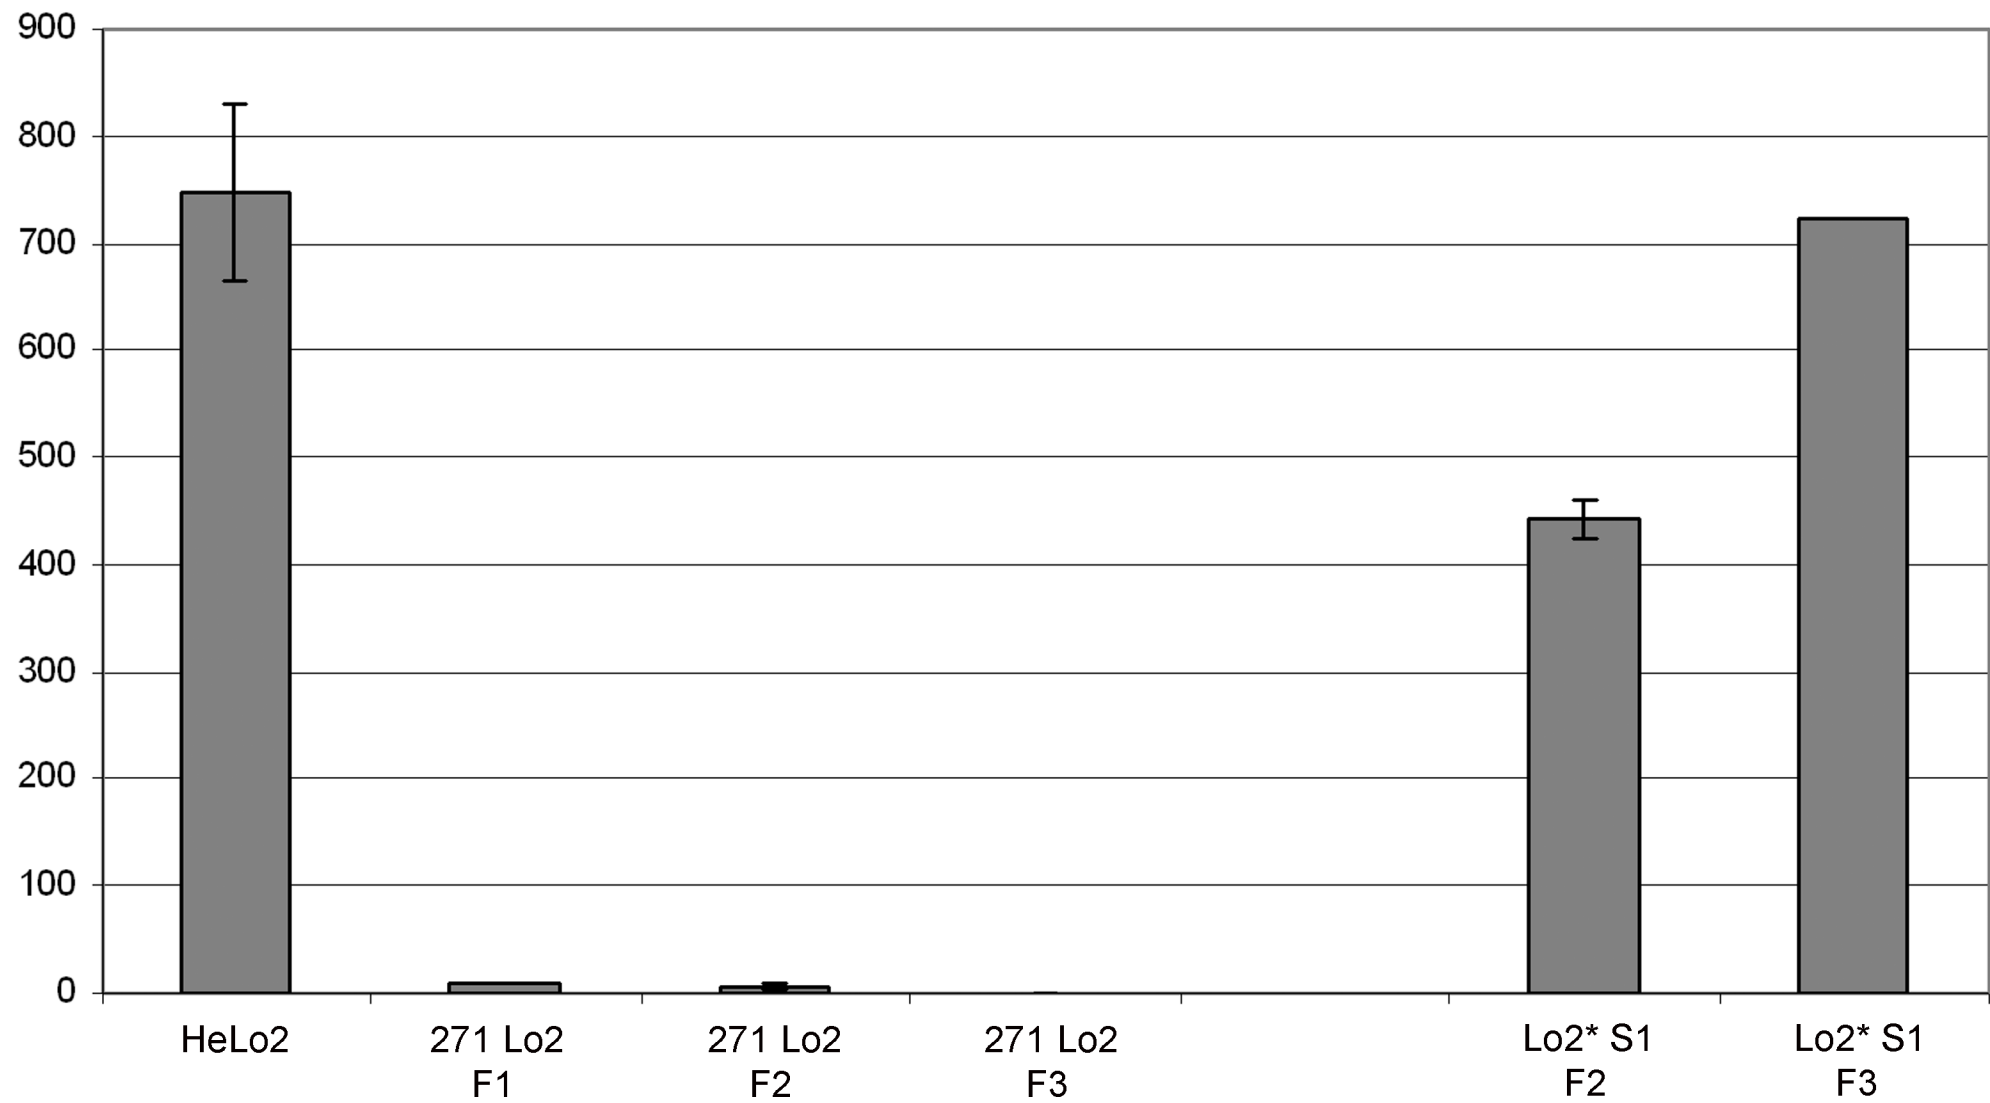**B:**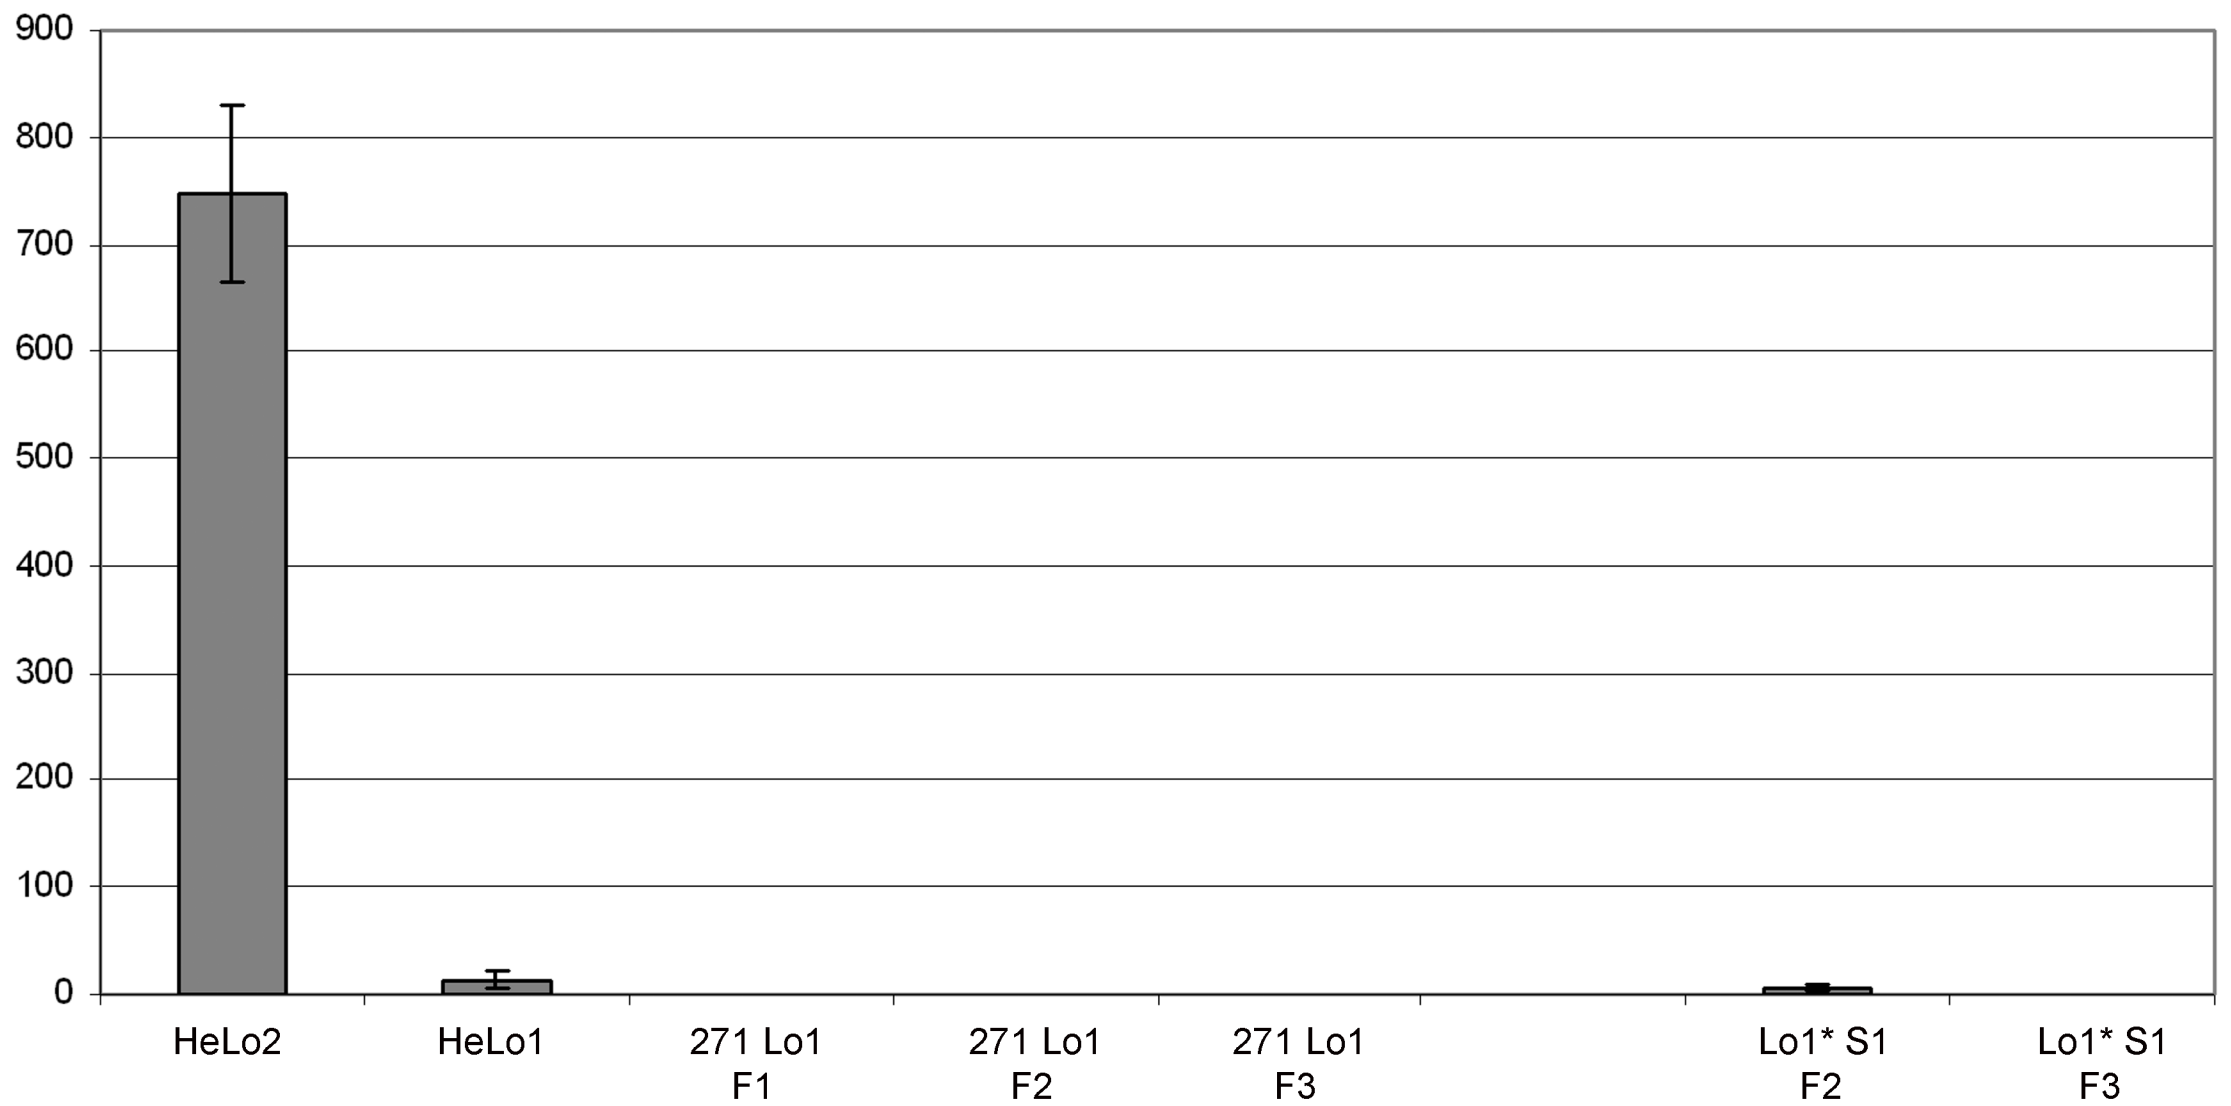

**A:**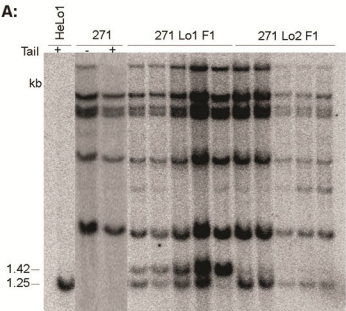

271

target Lo1,Lo2

— Methylated  
— Non-methylated

**B:**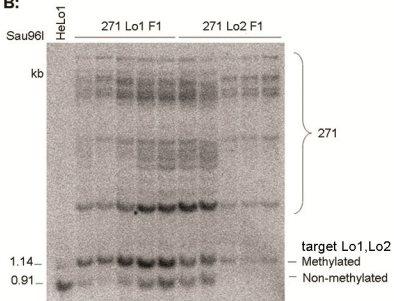

**A:**

271 Lo2 F1

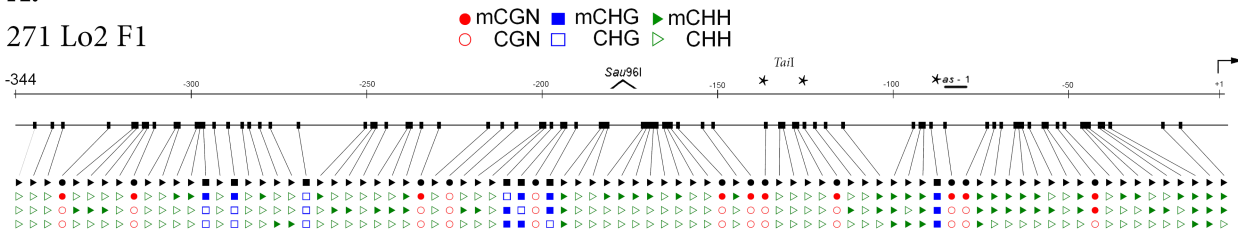

Lo2\* S1 F2

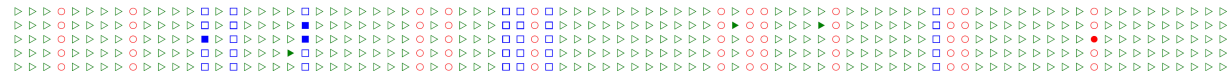

271 Lo2 F2

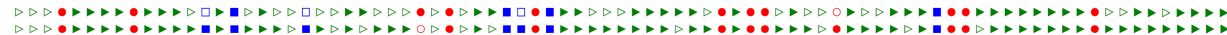

Lo2\* S1 F3

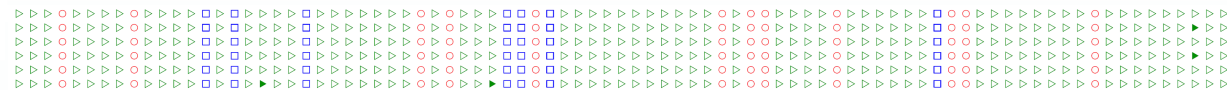

271 Lo2 F3

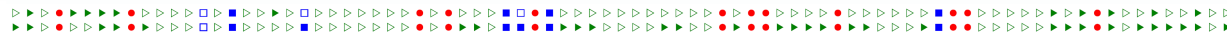

Lo2\* S1 F4

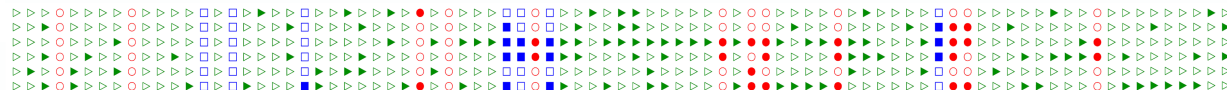**B:**

Lo1\* S1 F2

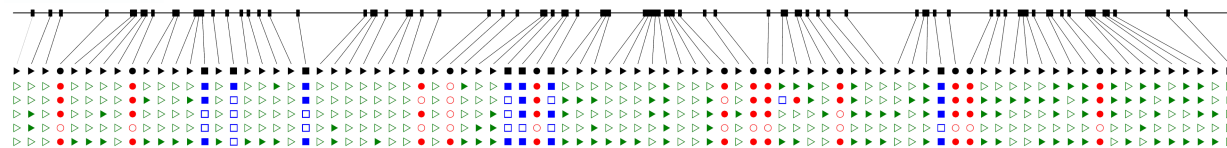

Lo1\* S2 F3

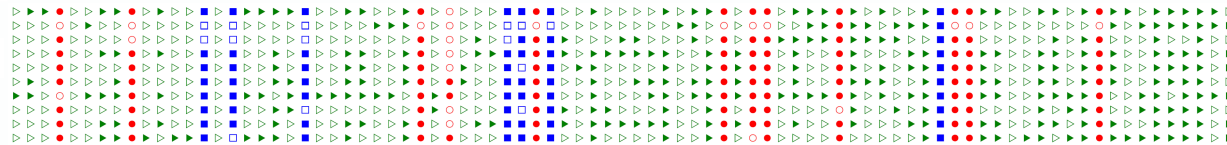

Lo1\* S1 F3

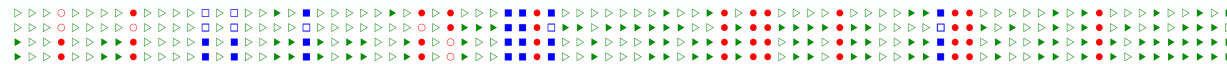

Supplement: epi0605_0650SD1.pdf [file epi0605_0650SD1.pdf]
